# Supplementary material for: A multi‐faceted approach testing the effects of previous bacterial exposure on resistance and tolerance
Source: PubMed Central journal article supplement (PMC6487967; doi:10.1111/1365-2656.12953), 2019-03-06
Supplement: JANE-88-566-s002.pdf [file JANE-88-566-s002.pdf]

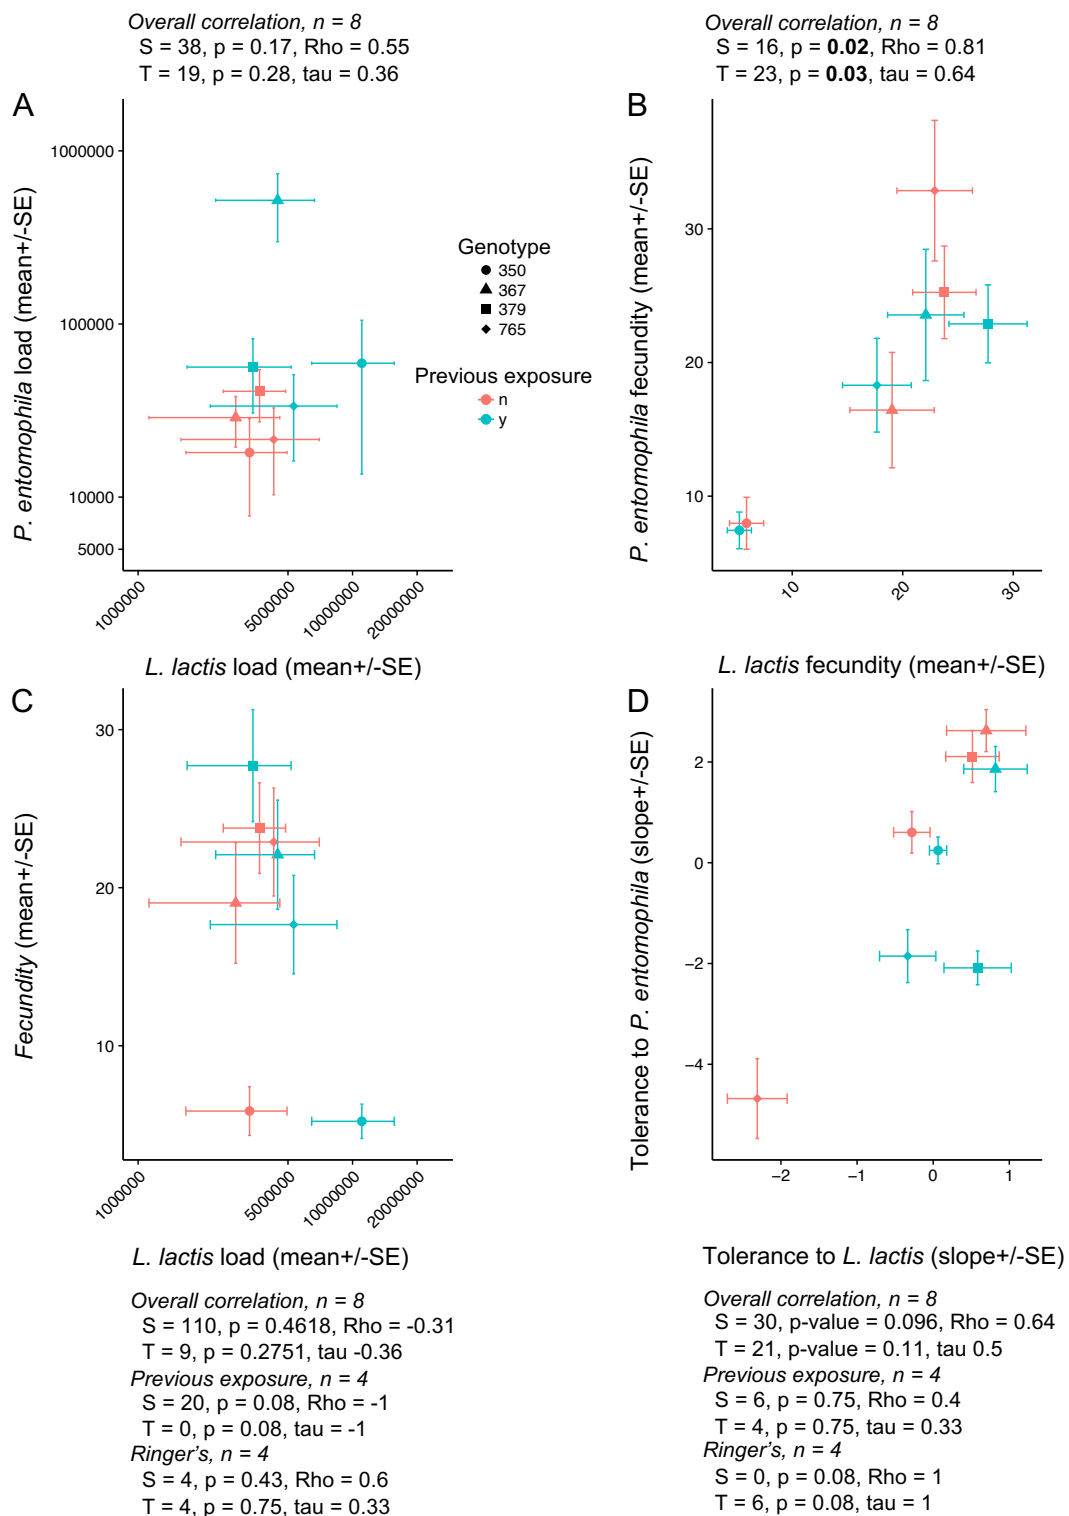

**Fig. S2. Correlations between bacteria load (resistance), fecundity and tolerance in Experiment 1.** (A) Relationship between *P. entomophila* load and *L. lactis* load one day post live challenge. (B) Relationship between *L. lactis* load and fecundity one day post live challenge. (C) Significant positive correlation between fecundity from *P. entomophila* and *L. lactis* infected females one day post infection. (D) Relationship between tolerance to *P. entomophila* and tolerance to *L. lactis*. The legend illustrates the genotypes and the primary exposure treatment. Statistical values for Spearman's Rho and Kendall's tau as well as the corresponding p-values are above or below each panel.
