# Supplementary material for: A multi‐faceted approach testing the effects of previous bacterial exposure on resistance and tolerance
Source: PubMed Central journal article supplement (PMC6487967; doi:10.1111/1365-2656.12953), 2019-03-06
Supplement: JANE-88-566-s004.pdf [file JANE-88-566-s004.pdf]

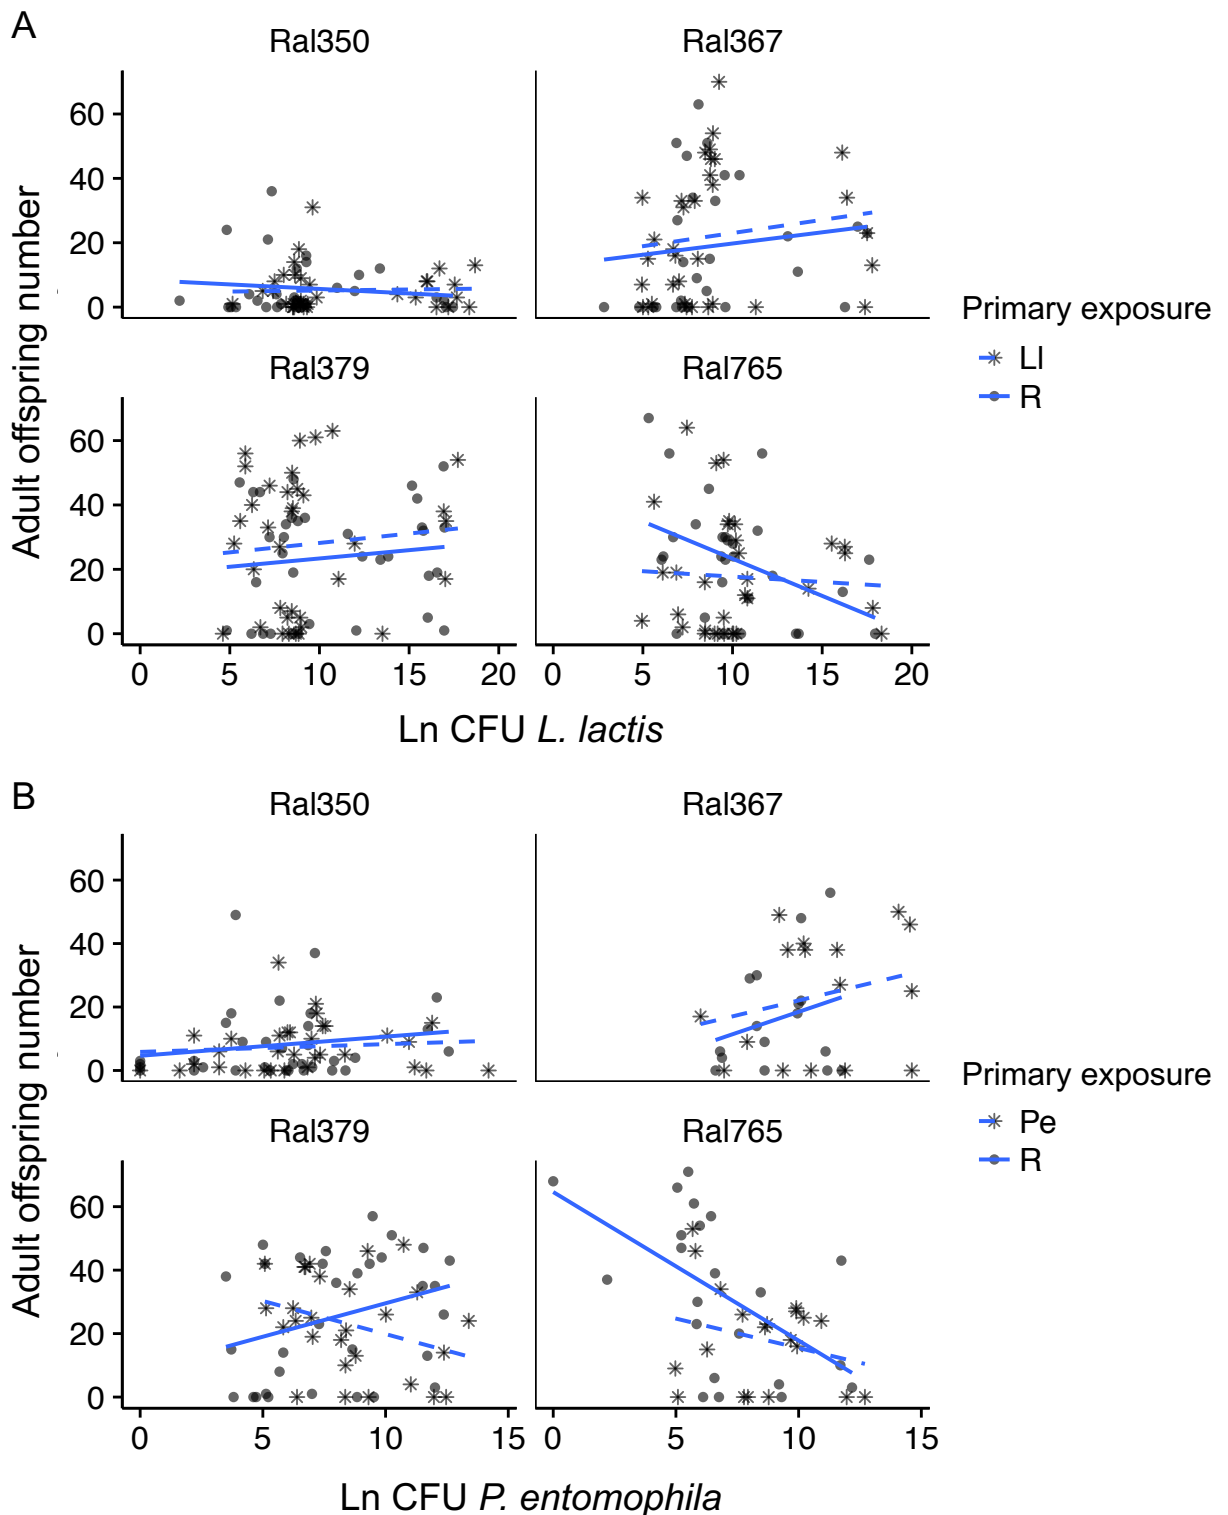

**Fig. S4. Fecundity tolerance in relation to primary exposure and genotype 24 hours post challenge.** Tolerance curves are plotted for each genotype and primary exposure-challenge treatment combination. **(A)** shows flies challenged with *L. lactis* and **(B)** shows flies challenged with *P. entomophila*.
