# Supplementary material for: A multi‐faceted approach testing the effects of previous bacterial exposure on resistance and tolerance
Source: PubMed Central journal article supplement (PMC6487967; doi:10.1111/1365-2656.12953), 2019-03-06
Supplement: JANE-88-566-s005.pdf [file JANE-88-566-s005.pdf]

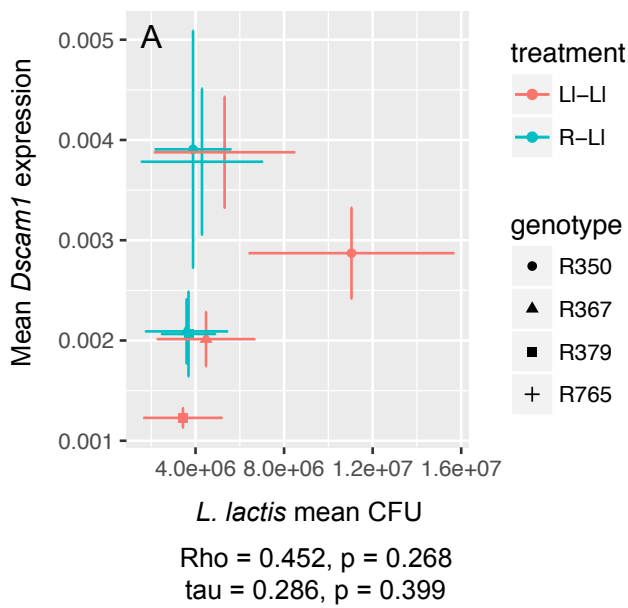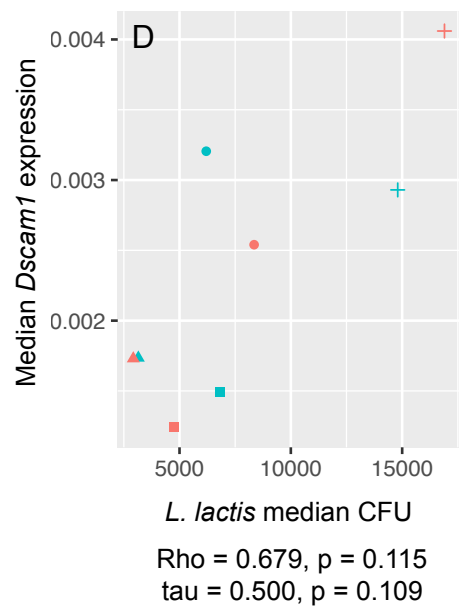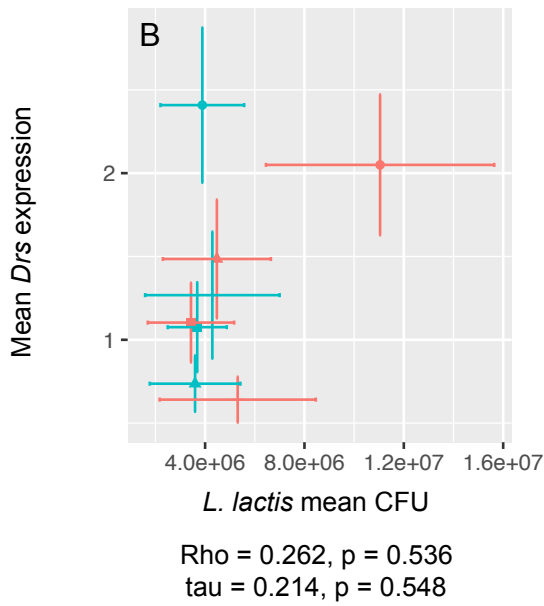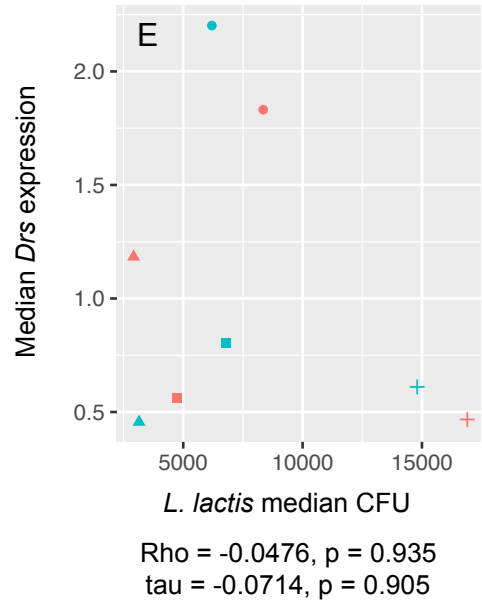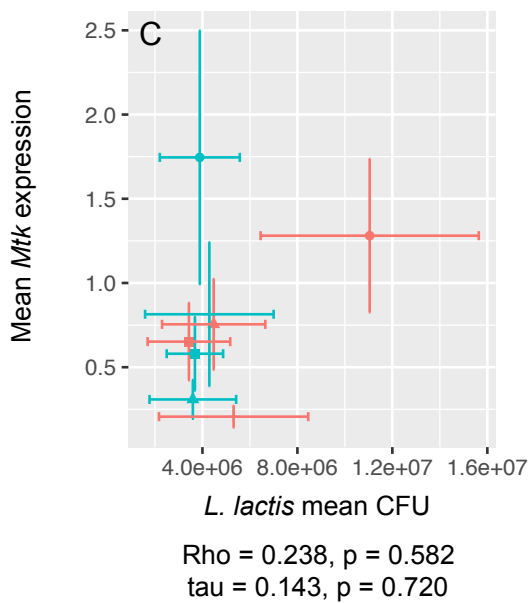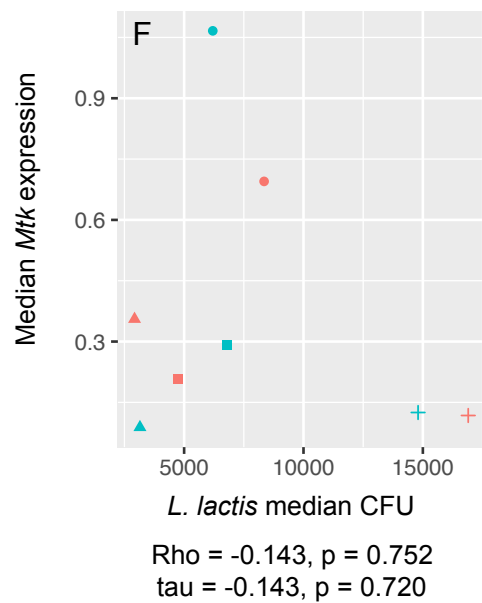

**Fig. S5. Correlations between gene expression and *L. lactis* load.** (A)-(C) Correlations between mean gene expression and mean *L. lactis* CFU count where each data point results from the mean and standard error from different individuals from the same treatment group / genotype. (D)-(F) Correlations between median gene expression and median CFU count per treatment group / genotype. The legend illustrates the primary exposure-challenge treatment where R is Ringer's and LI is *L. lactis*, and the symbols indicate the genotypes. Statistical values for Spearman's Rho and Kendall's tau as well as the corresponding p-values are below each panel.
